# Supplementary material for: Space-confined twin-polymerization enabling homogeneous integration of ultrafine TiO2 nanoparticles into a sulfur-doped carbon matrix for boosting lithium storage
Source: Royal Society of Chemistry journal article supplement (doi:10.1039/d4cc00765d), 2024-01-01
Supplement: d4cc00765d1.pdf [file d4cc00765d1.pdf]

*Supplementary Information for*

**Space-Confined Twin-Polymerization Enabling Homogeneous Integration of  
Ultrafine TiO<sub>2</sub> Nanoparticles into Sulfur-Doped Carbon Matrix for Boosting  
Lithium Storage**

**Haisheng Huang,<sup>a</sup> Yun Lu,<sup>b</sup> Shuguang Bi,<sup>\*a</sup> Changwang Yan,<sup>b</sup> and Yingkui Yang<sup>\*ab</sup>**

*<sup>a</sup> State Key Laboratory of New Textile Materials and Advanced Processing Technologies,*

*Wuhan Textile University, Wuhan 430200, China*

*E-mail: [sgbi@wtu.edu.cn](mailto:sgbi@wtu.edu.cn); [ykyang@wtu.edu.cn](mailto:ykyang@wtu.edu.cn)*

*<sup>b</sup> School of Materials Science and Engineering, Hubei University, Wuhan 430062, China*

## Experimental section

*Materials:* 2-Thiophenemethanol (98%, ThM), and titanium ethoxide (TTEO) were purchased from Beijing Bailingwei Co., Ltd. Trifluoroacetic acid (CF<sub>3</sub>COOH), toluene, dichloromethane, ethanol, acetone and *n*-hexane are commercially available from Sinopharm Group Chemical Reagent Co., Ltd., China. All chemical solvents are analytical grade, and were purified by distillation before use.

*Synthesis of Ti-ThM:* ThM (8.12 g, 6.7 mL), TTEO (4.01g, 3.7 mL) and 0.3 wt% KOH were mixed at 80°C for 1 h and then 100°C for 1 h under an argon atmosphere [Refs: *Macromol. Rapid Commun.*, 2015, **36**, 1623; *Macromol. Theory Simul.*, 2012, **21**, 615]. The reaction mixture was subjected to the re-crystallization by a pre-mixed solvent of toluene and *n*-hexane (1:1 v/v). The brown crystal (6.7 g) of Ti-ThM was collected by drying at 60°C overnight under vacuum.

*Preparation of *tp*-TiO<sub>2</sub>@SC derived from twin polymerization:* Typically, Ti-ThM (2.0 g) was dissolved in toluene (10 mL) at room temperature, and the resulting mixture was slowly added to a solution of CF<sub>3</sub>COOH (0.89 mL) in dichloromethane (5 mL) under an argon atmosphere. The brown solution was then heated to 60°C for 0.5 h and 100°C for 1 h, depositing a brownish black solid. The generated SiO<sub>2</sub>@poly(2-thiophenemethanol) (TiO<sub>2</sub>@PThM) composite was filtered and washed using dichloromethane, ethanol, and acetone until the filtrate was colorless. The dark TiO<sub>2</sub>@PThM product was further yielded by drying under vacuum at 60°C overnight. Finally, the resulted powder was thermally annealed at 550°C for 5 h under argon atmosphere, producing ultrafine TiO<sub>2</sub> nanoparticles encapsulated in the S-doped carbon matrix (*tp*-TiO<sub>2</sub>@SC).

*Preparation of *sp*-TiO<sub>2</sub>/SC derived from simultaneous polymerization:* For comparison, *sp*-TiO<sub>2</sub>/SC was similarly produced by simultaneous polymerization as described elsewhere [Ref: *Energy Technol.*, 2019, **7**, 1900247]. As mentioned above, Ti-ThM has a stoichiometric ratio (3.5:1) of ThM to TTEO in its chemical structure. Therefore, two individual monomers of

ThM and TTEO with an equivalent feed ratio of 3.5:1 were simultaneously initiated by  $\text{CF}_3\text{COOH}$  to perform one-pot cationic polymerization under identical experimental processes (**Fig. S4a**). The *sp*- $\text{TiO}_2/\text{SC}$  product was finally obtained by carbonizing the  $\text{TiO}_2/\text{PThM}$  composite.

In a control experiment, bulk  $\text{TiO}_2$  nanoparticles were also prepared using ethanol instead of ThM under similar experimental conditions as reported previously [Ref: *Energy Technol.*, 2019, 7, 1900247].

*Materials characterization:* TEM images were obtained from TecnaiG20 transmission electron microscope at an acceleration voltage of 200 kV. XRD patterns were collected on a Rigaku D/Max2400 diffractometer equipped with a  $\text{CuK}\alpha$  radiation source in the range of  $2\theta = 5\text{--}80^\circ$ . Vibrational properties were analyzed using a Renishaw Raman spectrometer by exciting at 514.5 nm. TGA was carried out on a Mettler Toledo (Switzerland) at a heating rate of  $20^\circ\text{C min}^{-1}$  in air atmosphere. XPS spectra were determined by X-ray photoelectron spectrometer (PHI MultiPak) with an excitation source of  $\text{Mg K}\alpha$  radiation.

*Electrochemical measurements:* Battery measurements were performed using a coin-type cell (model 2032). The electrodes were fabricated by mixing 80% active materials, 10% acetylene black, and 10% polyvinylidene fluoride in *N*-methyl pyrrolidone. The resulting uniform slurry was then coated onto a Cu foil and the solvent was evaporated at  $90^\circ\text{C}$  for 12 h under vacuum. The lithium foil, the porous membrane (Celgard 2400) were used as the counter electrode, and the separator, respectively. 1 M  $\text{LiPF}_6$  solution in a 1:1 (volume) mixture of ethylene carbonate and dimethyl carbonate was used as the electrolyte. Charge/discharge profiles were recorded on a LAND CT2001A battery measurement system. Both CV and EIS tests were performed on a CHI 760D electrochemical work station.

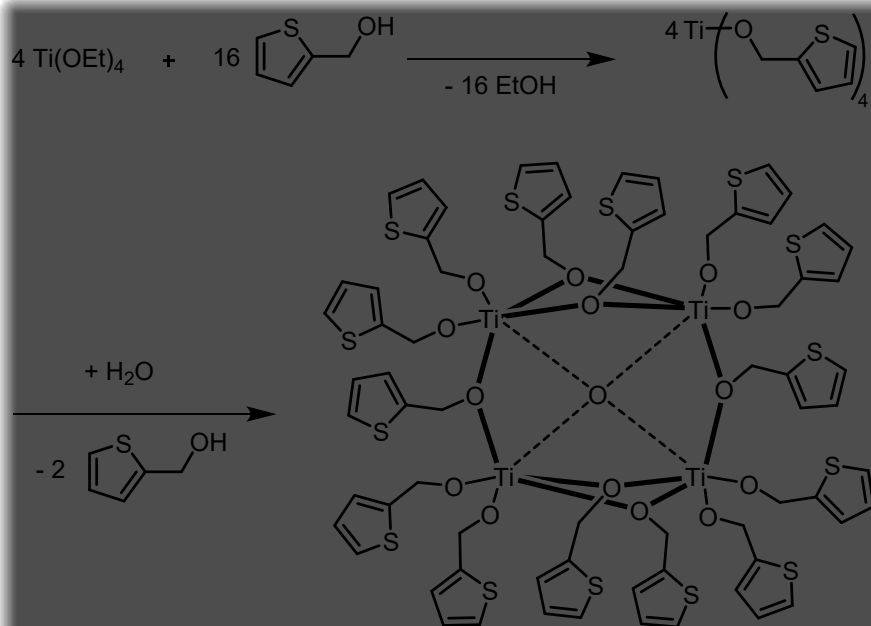

**Fig. S1** Synthesis routes of ( $\mu$ 4-oxido)-hexakis( $\mu$ -thiophene-2-methoxo)-octakis(thiophene-2-methoxo)-tetratitanium (Ti-ThM).

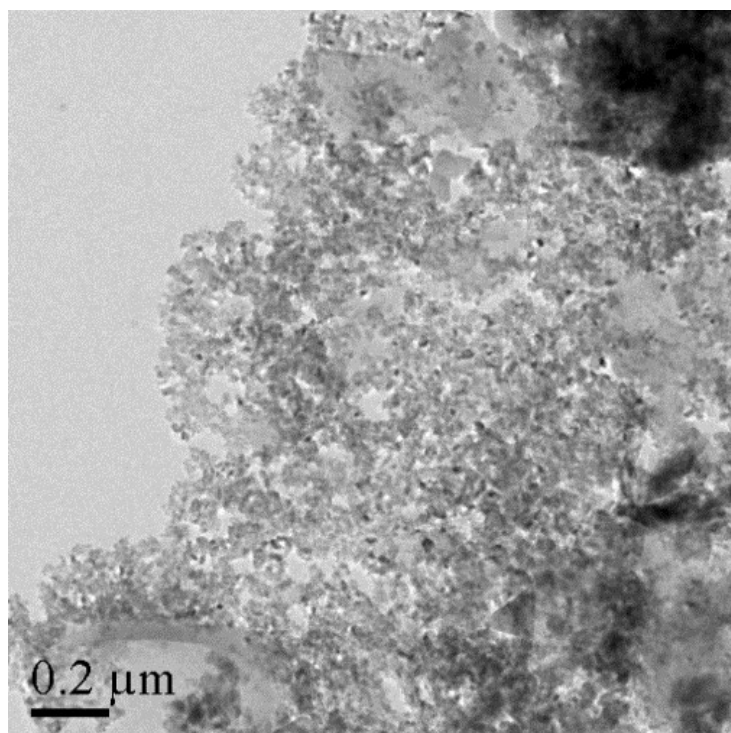

**Fig. S2** Typical TEM image of the  $\text{TiO}_2\text{@PThM}$  composite.



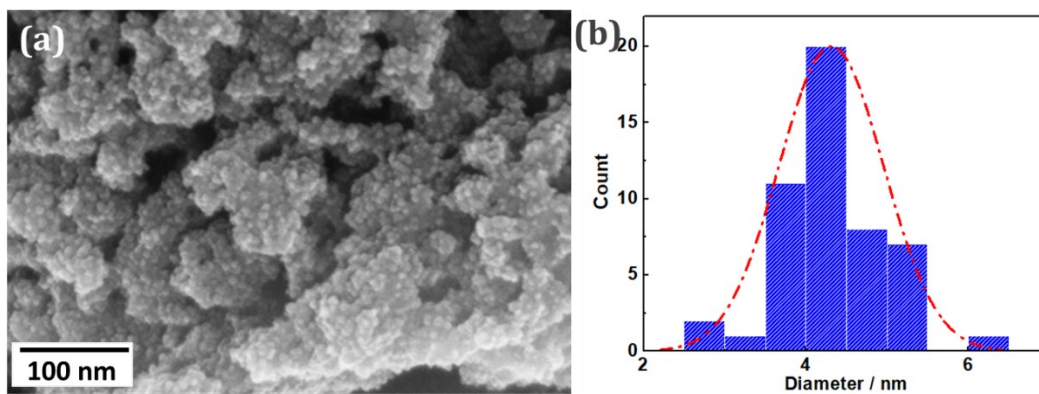

**Fig. S3** (a) Typical SEM image, and (b) size distribution diagram of *tp*-TiO<sub>2</sub>@SC.

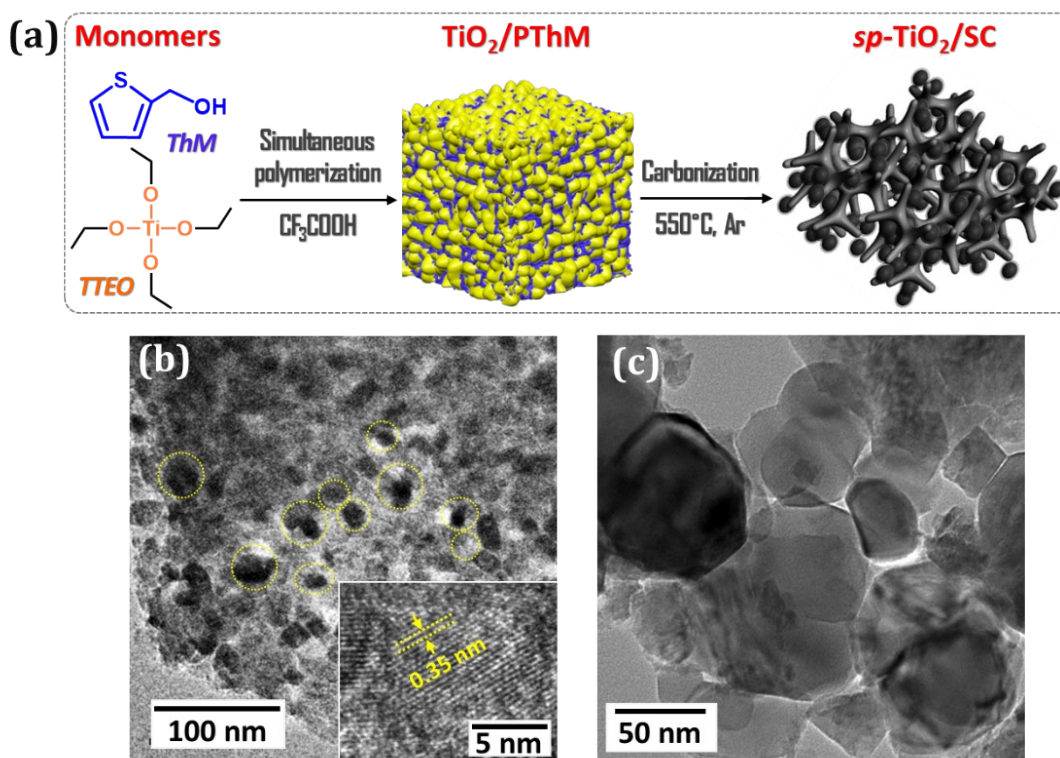

**Fig. S4** (a) CF<sub>3</sub>COOH-catalyzed simultaneous polymerization of individual ThM and TTEO with an equivalent feed ratio of 3.5:1 to produce the TiO<sub>2</sub>/PThM composite and subsequent thermal carbonization to form TiO<sub>2</sub> nanoparticles in the S-doped carbon matrix (*sp*-TiO<sub>2</sub>/SC), and typical TEM images of (b) *sp*-TiO<sub>2</sub>/SC and (c) bulk TiO<sub>2</sub>.

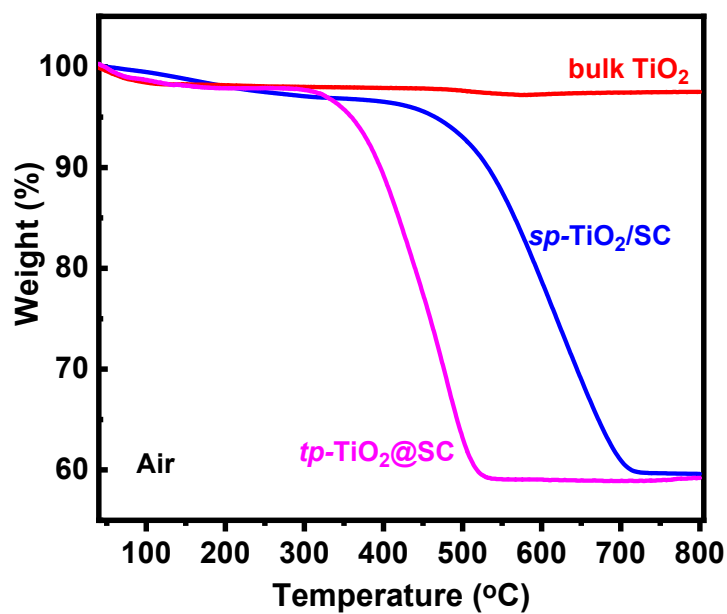

Fig. S5 TGA curves of  $tp\text{-TiO}_2@SC$ ,  $sp\text{-TiO}_2/SC$ , and bulk  $\text{TiO}_2$  measured in air.

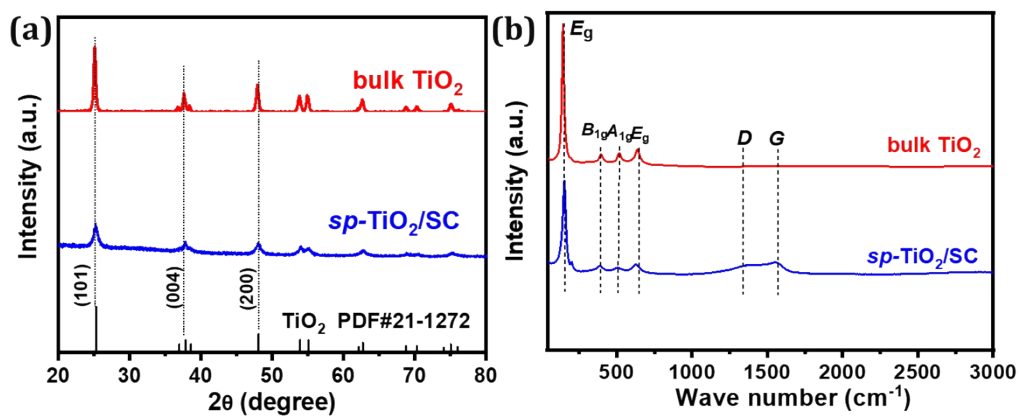

Fig. S6 (a) XRD patterns and (b) Raman spectra of  $sp\text{-TiO}_2/SC$ , and bulk  $\text{TiO}_2$ .

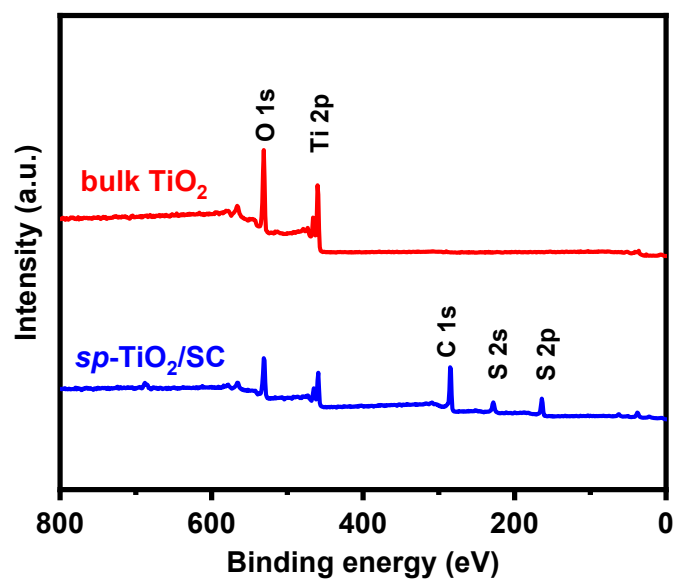

Fig. S7 XPS survey spectra of *sp*-TiO<sub>2</sub>/SC, and bulk TiO<sub>2</sub>.

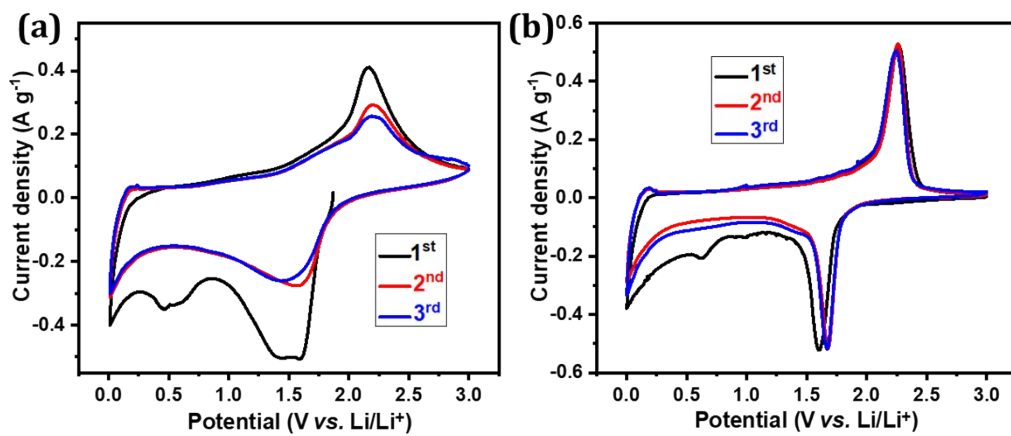

Fig. S8 CV profiles of (a) *sp*-TiO<sub>2</sub>/SC, and (b) bulk TiO<sub>2</sub> at 0.2 mV s<sup>-1</sup>.



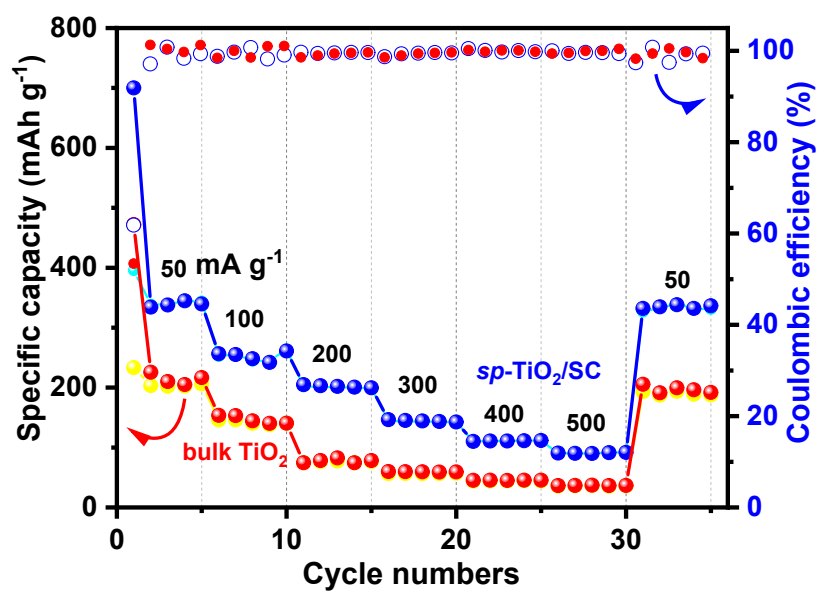

**Fig. S9** Rate performance of *sp*-TiO<sub>2</sub>/SC and bulk TiO<sub>2</sub> in the range of 50 to 500 mA g<sup>-1</sup>.

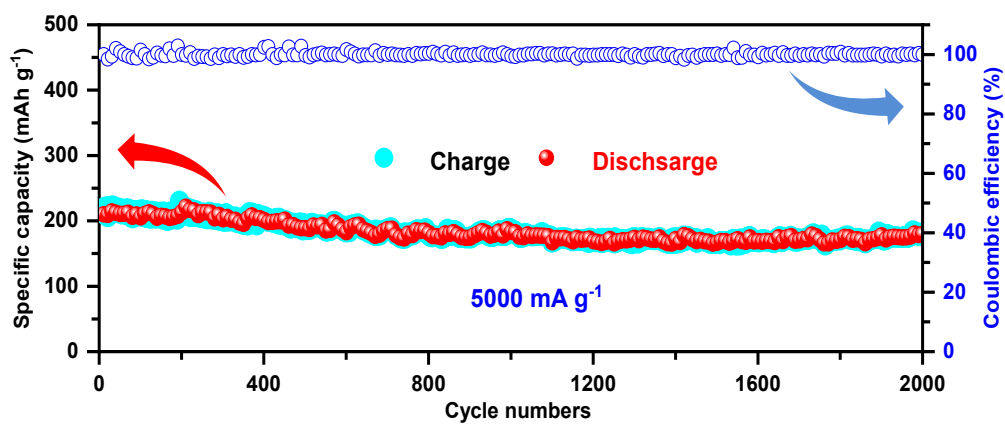

**Fig. S10** Cycling stability after running 2000 cycles at 5000 mA g<sup>-1</sup> for *tp*-TiO<sub>2</sub>@SC.

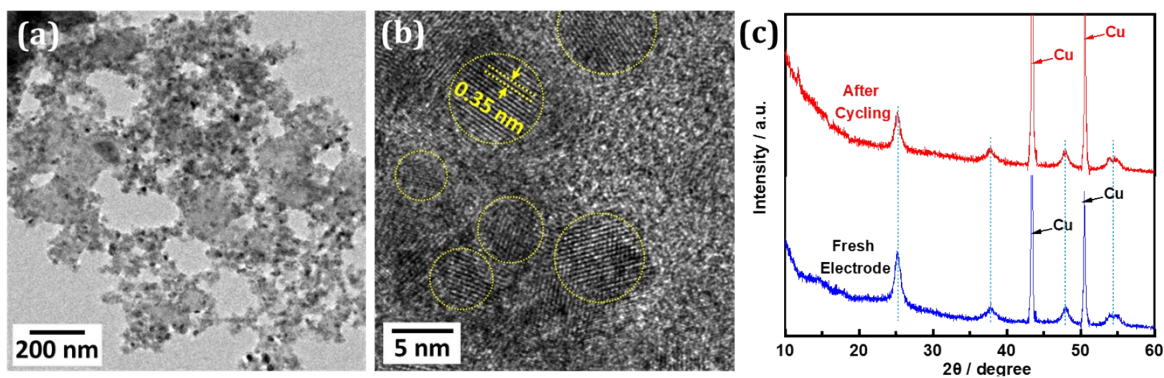

**Fig. S11** Typical TEM images (a, b) and (c) XRD patterns of the  $tp\text{-TiO}_2@SC$  electrode after running 200 cycles at  $50\text{ mA g}^{-1}$ .

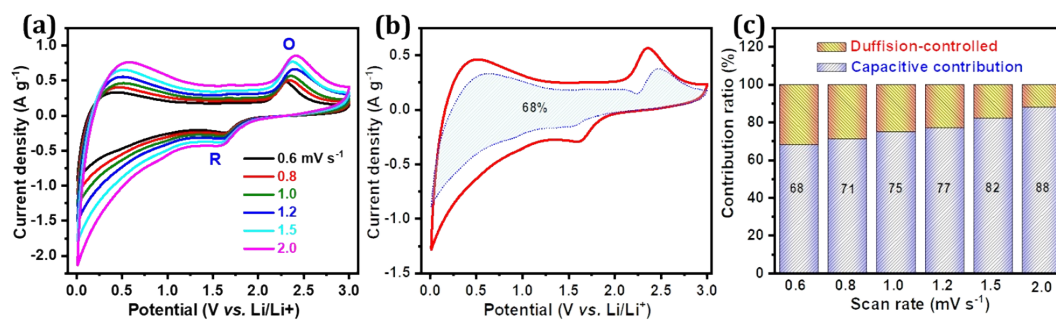

**Fig. S12** (a) CV curves of  $tp\text{-TiO}_2@SC$  at sweep rates of 0.6 to  $2.0\text{ mV s}^{-1}$ , (b) the capacitive- (blue) and diffusion-controlled contribution (blank) at  $0.6\text{ mV s}^{-1}$ , and (c) the normalized capacitive-/diffusion-controlled contribution fractions at various scan rates.

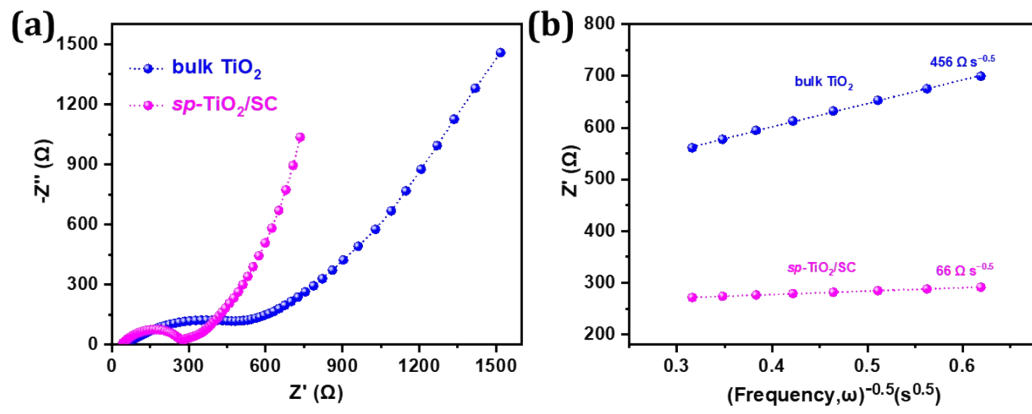

**Fig. S13** (a) Nyquist plots and (b) the relationship between the real part of impedance ( $Z'$ ) and the reciprocal of square root of frequency ( $\omega^{-0.5}$ ) of  $sp\text{-TiO}_2/\text{SC}$  and bulk  $\text{TiO}_2$ .

**Table S1** Lithium storage performance of TiO<sub>2</sub>/carbon composites

| Materials                                          | TiO <sub>2</sub> size (nm) | Carbon (wt%) | Cycle performance                                                                                                                      | Rate capability                                                                                         | References                                       |
|----------------------------------------------------|----------------------------|--------------|----------------------------------------------------------------------------------------------------------------------------------------|---------------------------------------------------------------------------------------------------------|--------------------------------------------------|
| <i>sp</i> -TiO <sub>2</sub> @SC                    | 5                          | 40.9         | 582 mAh g <sup>-1</sup> after 200 cycles at 0.05 A g <sup>-1</sup><br>144 mAh g <sup>-1</sup> after 2000 cycles at 5 A g <sup>-1</sup> | 667 mAh g <sup>-1</sup> at 0.05 A g <sup>-1</sup><br>313 mAh g <sup>-1</sup> at 0.5 A g <sup>-1</sup>   | This work                                        |
| TiO <sub>2</sub> /metal-organic frameworks         | 9.9                        | 35.7         | 446 mAh g <sup>-1</sup> after 1000 cycles                                                                                              | 646 mAh g <sup>-1</sup> at 0.017 A g <sup>-1</sup><br>335 mAh g <sup>-1</sup> at 3.36 A g <sup>-1</sup> | [1] <i>Chem. Eng. J.</i> 2022, 430,132689        |
| TiO <sub>2</sub> /porous carbons                   | -                          | 72           | 377 mAh g <sup>-1</sup> after 50 cycles                                                                                                | 377 mAh g <sup>-1</sup> at 0.035 A g <sup>-1</sup><br>117 mAh g <sup>-1</sup> at 0.7 A g <sup>-1</sup>  | [2] <i>Res. Chem. Intermed.</i> 2017, 43,2891    |
| TiO <sub>2</sub> /graphitic carbons                | -                          | -            | 321 mAh g <sup>-1</sup> after 1000 cycles                                                                                              | 434 mAh g <sup>-1</sup> at 0.1 A g <sup>-1</sup><br>255 mAh g <sup>-1</sup> at 5 A g <sup>-1</sup>      | [3] <i>Surf. Interfaces</i> 2022, 35,102404      |
| TiO <sub>2</sub> /N-rich carbons                   | 60~150                     | 54.8         | 303 mAh g <sup>-1</sup> after 125 cycles                                                                                               | 297 mAh g <sup>-1</sup> at 0.034 A g <sup>-1</sup><br>87 mAh g <sup>-1</sup> at 3.35 A g <sup>-1</sup>  | [4] <i>Electrochim. Acta</i> 2017, 255, 417      |
| TiO <sub>2</sub> @N-doped C                        | -                          | 17           | 462 mAh g <sup>-1</sup> after 300 cycles                                                                                               | 382 mAh g <sup>-1</sup> at 0.05 A g <sup>-1</sup><br>112 mAh g <sup>-1</sup> at 10 A g <sup>-1</sup>    | [5] <i>Electrochim. Acta</i> 2019, 299, 540      |
| TiO <sub>2</sub> @N-doped carbon coaxial nanotubes | -                          | 33.6         | 480 mAh g <sup>-1</sup> after 80 cycles                                                                                                | 480 mAh g <sup>-1</sup> at 0.1 A g <sup>-1</sup><br>140 mAh g <sup>-1</sup> at 2 A g <sup>-1</sup>      | [6] <i>Appl. Surf. Sci.</i> 2018, 458, 1018      |
| S-doped carbon@TiO <sub>2</sub>                    | 4~8                        | 78.1         | 648 mAh g <sup>-1</sup> after 200 cycles                                                                                               | 768 mAh g <sup>-1</sup> at 0.1 A g <sup>-1</sup><br>442 mAh g <sup>-1</sup> at 2 A g <sup>-1</sup>      | [7] <i>Energy Storage Mater.</i> 2018, 13, 215   |
| carbon@mesoporous TiO <sub>2</sub> @CNTs           | 5~6                        | 39.8         | 191 mAh g <sup>-1</sup> after 200 cycles                                                                                               | 223 mAh g <sup>-1</sup> at 0.017 A g <sup>-1</sup><br>115 mAh g <sup>-1</sup> at 0.85 A g <sup>-1</sup> | [8] <i>Electrochim. Acta</i> 2019, 312, 119      |
| R-TiO <sub>2</sub> @C hollow spheres               | >10                        | 5.7          | 191 mAh g <sup>-1</sup> after 200 cycles                                                                                               | 310 mAh g <sup>-1</sup> at 0.668 A g <sup>-1</sup><br>50 mAh g <sup>-1</sup> at 3.34 A g <sup>-1</sup>  | [9] <i>J. Alloy. Compd.</i> 2023, 969, 172258    |
| TiO <sub>2</sub> on graphene                       | -                          | 18.9         | 573 mAh g <sup>-1</sup> after 600 cycles                                                                                               | 373 mAh g <sup>-1</sup> at 0.1 A g <sup>-1</sup><br>199 mAh g <sup>-1</sup> at 5 A g <sup>-1</sup>      | [10] <i>J. Mater. Chem. A</i> 2018, 6, 7070      |
| Watermelon-like TiO <sub>2</sub> @carbon sphere    | ~25                        | 65.9         | 312 mAh g <sup>-1</sup> after 200 cycles                                                                                               | 496 mAh g <sup>-1</sup> at 0.085 A g <sup>-1</sup><br>180 mAh g <sup>-1</sup> at 3.4 A g <sup>-1</sup>  | [11] <i>Nanotechnology</i> 2020, 31, 215407      |
| Nanowires embedded porous TiO <sub>2</sub> @C      | -                          | 88           | 128 mAh g <sup>-1</sup> after 2500 cycles                                                                                              | 271 mAh g <sup>-1</sup> at 0.105 A g <sup>-1</sup><br>32 mAh g <sup>-1</sup> at 10.5 A g <sup>-1</sup>  | [12] <i>Ceram. Int.</i> 2020, 46, 9119           |
| TiO <sub>2</sub> /Carbon nanosheets                | -                          | ~40          | 273 mAh g <sup>-1</sup> after 1500 cycles                                                                                              | 575 mAh g <sup>-1</sup> at 0.1 A g <sup>-1</sup><br>79 mAh g <sup>-1</sup> at 12.8 A g <sup>-1</sup>    | [13] <i>ACS Appl. Nano Mater.</i> 2021, 4, 11288 |
| TiO <sub>2</sub> /S-doped carbon fibers            | -                          | 78.9         | 607 mAh g <sup>-1</sup> after 150 cycles                                                                                               | 738 mAh g <sup>-1</sup> at 0.1 A g <sup>-1</sup><br>454 mAh g <sup>-1</sup> at 2 A g <sup>-1</sup>      | [14] <i>Small</i> 2019, 15, 1902201              |

|                                                                        |         |      |                                              |                                                                                                         |                                                         |
|------------------------------------------------------------------------|---------|------|----------------------------------------------|---------------------------------------------------------------------------------------------------------|---------------------------------------------------------|
| TiO <sub>2</sub> @CNTs                                                 | -       | -    | 201 mAh g <sup>-1</sup><br>after 650 cycles  | 272 mAh g <sup>-1</sup> at 0.1 A g <sup>-1</sup><br>133 mAh g <sup>-1</sup> at 40 A g <sup>-1</sup>     | [15] <i>Adv. Mater. Interfaces</i> 2016, 3, 1600375     |
| TiO <sub>2</sub> @N-doped carbon foams                                 | 10      | -    | 149 mAh g <sup>-1</sup><br>after 100 cycles  | 203 mAh g <sup>-1</sup> at 0.1 A g <sup>-1</sup><br>104 mAh g <sup>-1</sup> at 2 A g <sup>-1</sup>      | [16] <i>Small</i> 2016, 12, 6724                        |
| Carbon nanolayer-wrapped TiO <sub>2</sub>                              | 30      | 15.5 | 403 mAh g <sup>-1</sup><br>after 1000 cycles | 474 mAh g <sup>-1</sup> at 0.1 A g <sup>-1</sup><br>182 mAh g <sup>-1</sup> at 5 A g <sup>-1</sup>      | [17] <i>ACS Appl. Nano Mater.</i> 2021, 4, 7832         |
| TiO <sub>2</sub> @carbon microspheres                                  | 20-50   | 28.2 | 322 mAh g <sup>-1</sup><br>after 100 cycles  | 351 mAh g <sup>-1</sup> at 0.1 A g <sup>-1</sup><br>145 mAh g <sup>-1</sup> at 2 A g <sup>-1</sup>      | [18] <i>Diam. Relat. Mater.</i> 2023, 136, 109913       |
| TiO <sub>2</sub> /carbon nanosheets                                    | 100     | 1.6  | 89 mAh g <sup>-1</sup><br>after 500 cycles   | 287 mAh g <sup>-1</sup> at 0.05 A g <sup>-1</sup><br>169 mAh g <sup>-1</sup> at 2 A g <sup>-1</sup>     | [19] <i>Adv. Mater. Interfaces</i> 2022, 9, 2102375     |
| N-doped carbon-coated TiO <sub>2</sub> hollow spheres                  | -       | 10.1 | 166 mAh g <sup>-1</sup><br>after 2000 cycles | 390 mAh g <sup>-1</sup> at 0.1 A g <sup>-1</sup><br>141 mAh g <sup>-1</sup> at 10 A g <sup>-1</sup>     | [20] <i>Nanoscale</i> . 2021, 13, 2 368                 |
| Carbon-coated TiO <sub>2</sub>                                         | 14.5    | 3.5  |                                              | 225 mAh g <sup>-1</sup> at 0.168 A g <sup>-1</sup><br>91 mAh g <sup>-1</sup> at 8.4 A g <sup>-1</sup>   | [21] <i>ACS Appl. Mater. Interfaces</i> 2019, 11, 11391 |
| TiO <sub>2</sub> encapsulated by sawdust-derived biochar               | 10      | -    | 100 mAh g <sup>-1</sup><br>after 2500 cycles | 418 mAh g <sup>-1</sup> at 0.1 A g <sup>-1</sup><br>60 mAh g <sup>-1</sup> at 5 A g <sup>-1</sup>       | [22] <i>Sci. Total Environ.</i> 2021, 794, 148688       |
| TiO <sub>2</sub> in pomegranate-like carbon sphere                     | 10~20   | 68.9 | 203 mAh g <sup>-1</sup><br>after 2000 cycles | ~300 mAh g <sup>-1</sup> at 0.1 A g <sup>-1</sup><br>~100 mAh g <sup>-1</sup> at 5 A g <sup>-1</sup>    | [23] <i>J. Colloid Interf. Sci.</i> 2023, 633 546-554   |
| TiO <sub>2</sub> in carbon nanospheres                                 | -       | 67.6 | 895 mAh g <sup>-1</sup><br>after 100 cycles  | 959 mAh g <sup>-1</sup> at 0.062 A g <sup>-1</sup><br>244 mAh g <sup>-1</sup> at 1.55 A g <sup>-1</sup> | [24] <i>Ionics</i> 2022, 28, 1635                       |
| TiO <sub>2</sub> @holely carbon nanofibers                             | -       | 19   | 354 mAh g <sup>-1</sup><br>after 100 cycles  | 473 mAh g <sup>-1</sup> at 0.1 A g <sup>-1</sup><br>147 mAh g <sup>-1</sup> at 5 A g <sup>-1</sup>      | [25] <i>J. Alloy. Compd.</i> 2022, 926, 166943          |
| Carbon modified hierarchical hollow tubes composed of TiO <sub>2</sub> | -       | -    | 177 mAh g <sup>-1</sup><br>after 100 cycles  | 188 mAh g <sup>-1</sup> at 0.175 A g <sup>-1</sup><br>106 mAh g <sup>-1</sup> at 3.5 A g <sup>-1</sup>  | [26] <i>J. Alloy. Compd.</i> 2021, 857,158048           |
| TiO <sub>2</sub> /carbon nanosheet                                     | 10~20   | 6.3  | 110 mAh g <sup>-1</sup><br>after 2000 cycles | 220 mAh g <sup>-1</sup> at 0.168 A g <sup>-1</sup><br>38 mAh g <sup>-1</sup> at 8.4 A g <sup>-1</sup>   | [27] <i>J. Mater. Sci. Technol.</i> 2019, 35, 1977      |
| Graphene-boosted defective rutile TiO <sub>2-x</sub>                   | 200~300 | -    | 157 mAh g <sup>-1</sup><br>after 1400 cycles | 254 mAh g <sup>-1</sup> at 0.084 A g <sup>-1</sup><br>134 mAh g <sup>-1</sup> at 0.84 A g <sup>-1</sup> | [28] <i>Mater. Chem. Front.</i> 2021, 5, 3226           |
| TiO <sub>2</sub> quantum dots confined in 3D carbon                    | -       | 12.1 | 76 mAh g <sup>-1</sup><br>after 10000 cycles | 421 mAh g <sup>-1</sup> at 0.1 A g <sup>-1</sup><br>108 mAh g <sup>-1</sup> at 5 A g <sup>-1</sup>      | [29] <i>J. Colloid Interf. Sci.</i> 2021, 582, 874      |
| TiO <sub>2</sub> -carbon hybrid nanostructures                         | -       | 28   | 321 mAh g <sup>-1</sup><br>after 100 cycles  | 447 mAh g <sup>-1</sup> at 0.06 A g <sup>-1</sup><br>251 mAh g <sup>-1</sup> at 1.2 A g <sup>-1</sup>   | [30] <i>Adv. Funct. Mater.</i> 2016, 26, 1338           |
| TiO <sub>2</sub> nanofibers decorated with N-doped carbon              | 8       | 9.2  | 176 mAh g <sup>-1</sup><br>after 2000 cycles | 401 mAh g <sup>-1</sup> at 0.034 A g <sup>-1</sup><br>97 mAh g <sup>-1</sup> at 6.7 A g <sup>-1</sup>   | [31] <i>ACS Appl. Mater. Interfaces</i> 2018, 10, 35060 |
| CNT-C@TiO <sub>2</sub>                                                 | 9~13    | 22.8 | 206 mAh g <sup>-1</sup><br>after 200 cycles  | 414 mAh g <sup>-1</sup> at 0.1 A g <sup>-1</sup><br>72 mAh g <sup>-1</sup> at 1.6 A g <sup>-1</sup>     | [32] <i>J. Mater. Sci.</i> 2019, 54, 592.               |
| Mesoporous TiO <sub>2</sub> /carbon spheres                            | -       | 1.9  | 140 mAh g <sup>-1</sup><br>after 600 cycles  | 161 mAh g <sup>-1</sup> at 0.34 A g <sup>-1</sup><br>103 mAh g <sup>-1</sup> at 1.7 A g <sup>-1</sup>   | [33] <i>ACS Sustainable Chem. Eng.</i> 2022, 10, 10955  |
| Carbon coated TiO <sub>2</sub> aerogel                                 | ~5      | 8.6  | 133 mAh g <sup>-1</sup><br>after 3000 cycles | 215 mAh g <sup>-1</sup> at 0.017 A g <sup>-1</sup><br>127 mAh g <sup>-1</sup> at 3.35 A g <sup>-1</sup> | [34] <i>Chem. Eng. J.</i> 2018, 351, 825                |
